# Supplementary material
Source: Springer Nature journal article supplement (https://www.springermedizin.de/resource/supplementary/12887_2011_486_MOESM1_ESM.pdf/9475256)

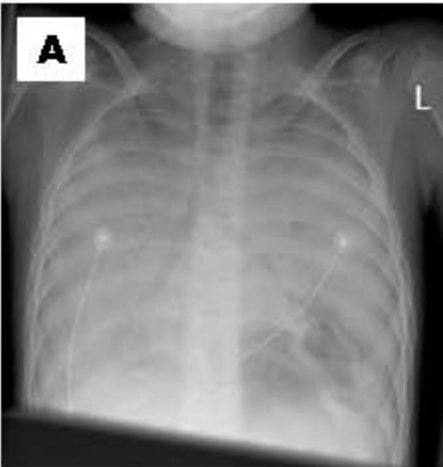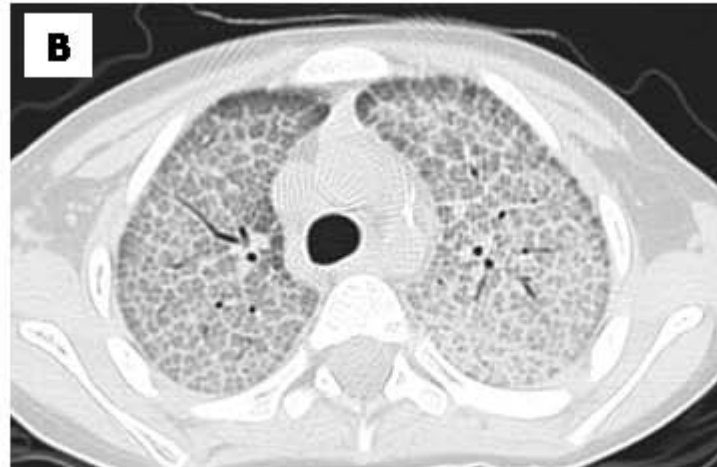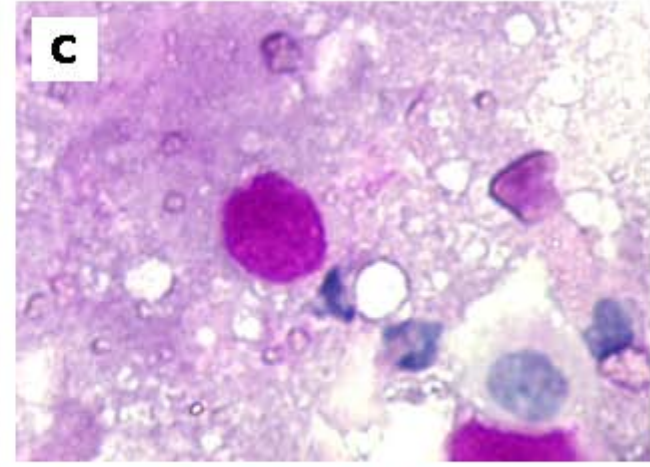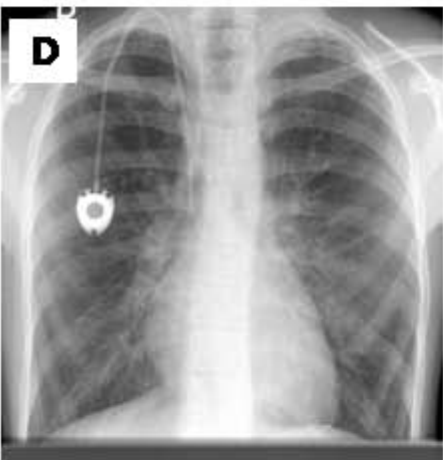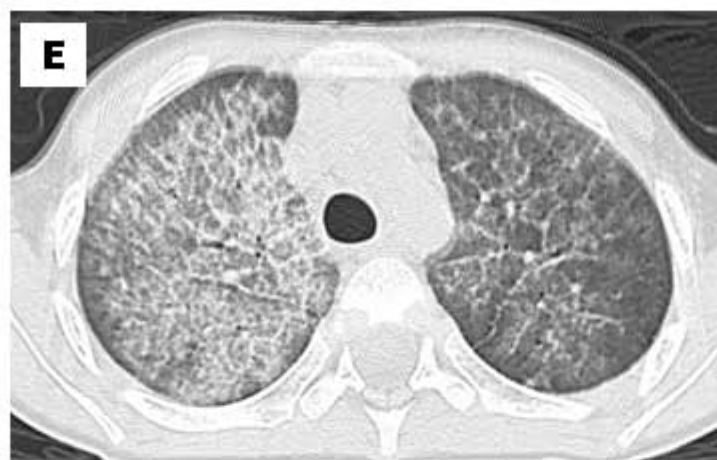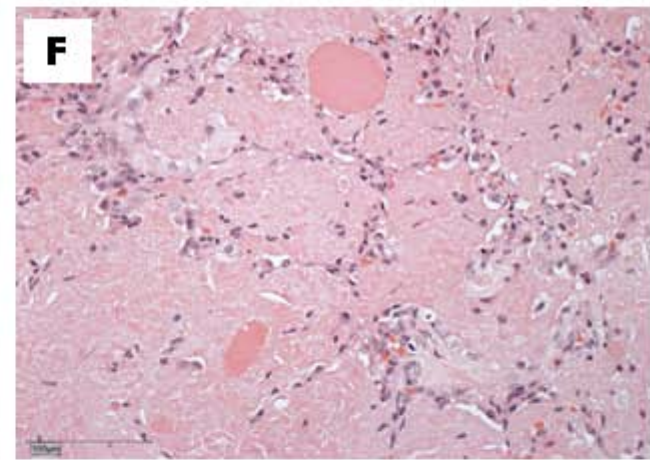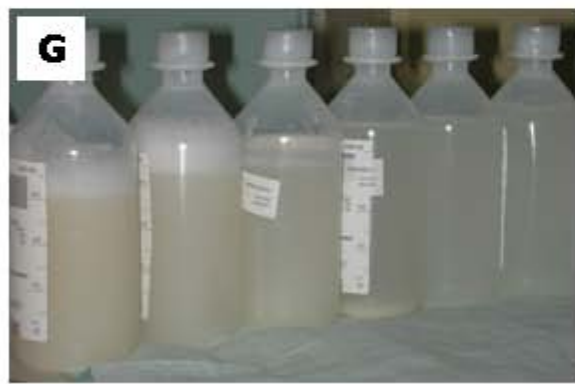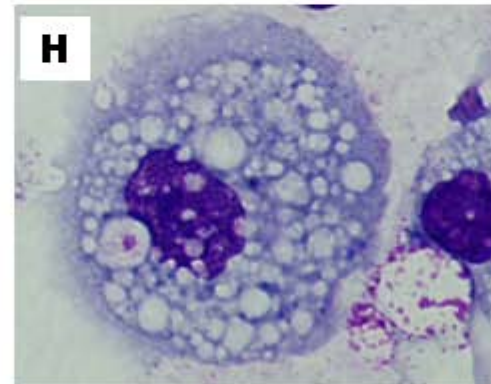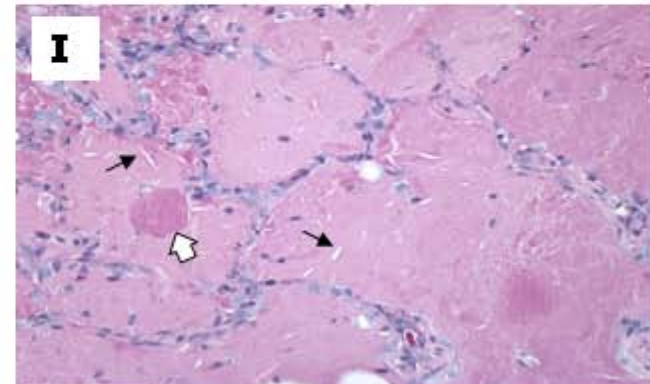

Supplement: MOESM1 [file 9475256]
